# Supplementary material for: The importance of rare species: a trait-based assessment of rare species contributions to functional diversity and possible ecosystem function in tall-grass prairies
Source: PubMed Central journal article supplement (PMC3894892; doi:10.1002/ece3.915), 2013-12-12

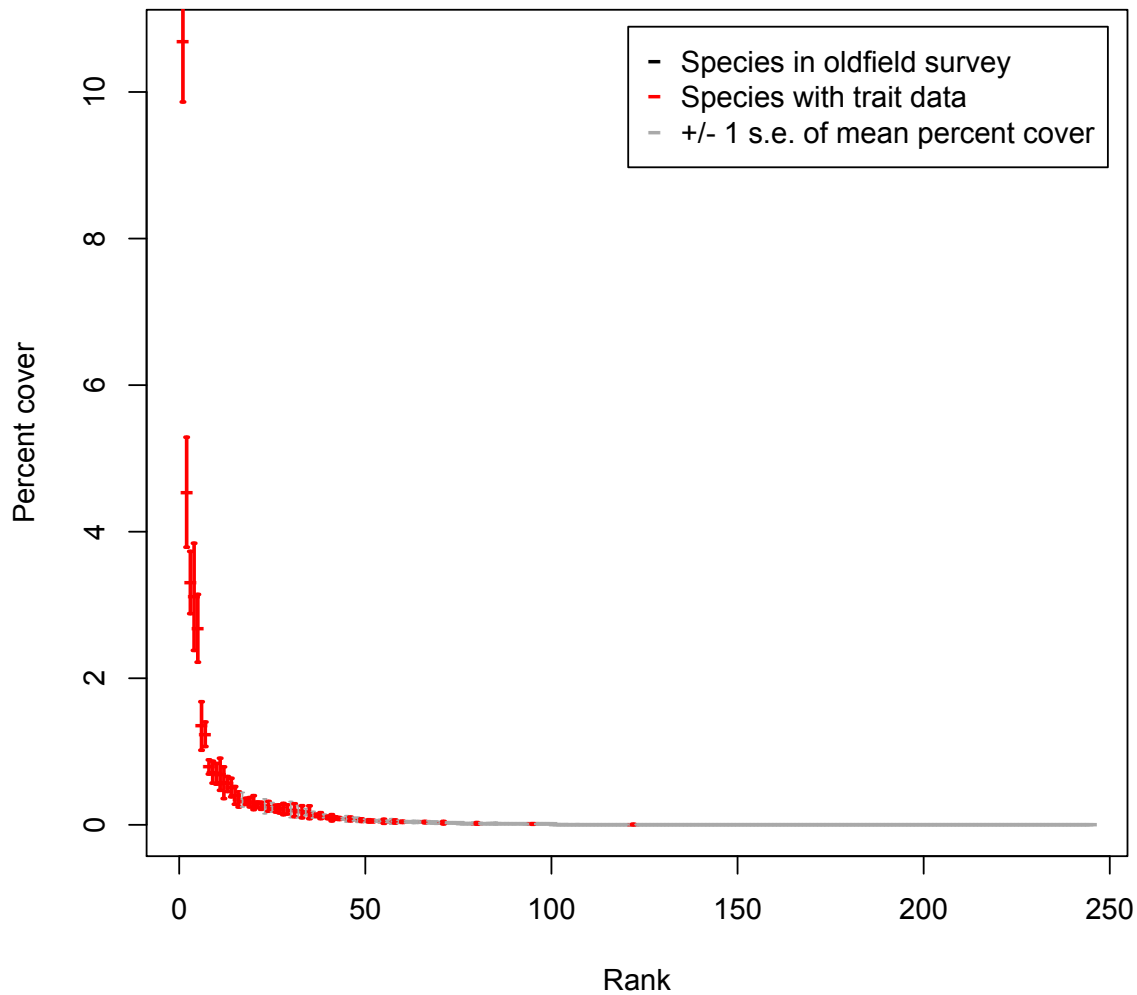

Supplement: ece30004-0104-SD1.pdf [file ece30004-0104-SD1.pdf]
